# Supplementary material
Source: HighWire-hosted journal article supplement (https://bmjopen.bmj.com/content/9/6/e026913)
Supplement: inline-supplementary-material-1 [file inline-supplementary-material-1.pdf]

Supplementary Figure 1. Cumulative incidence of atherosclerotic cardiovascular disease (Men)

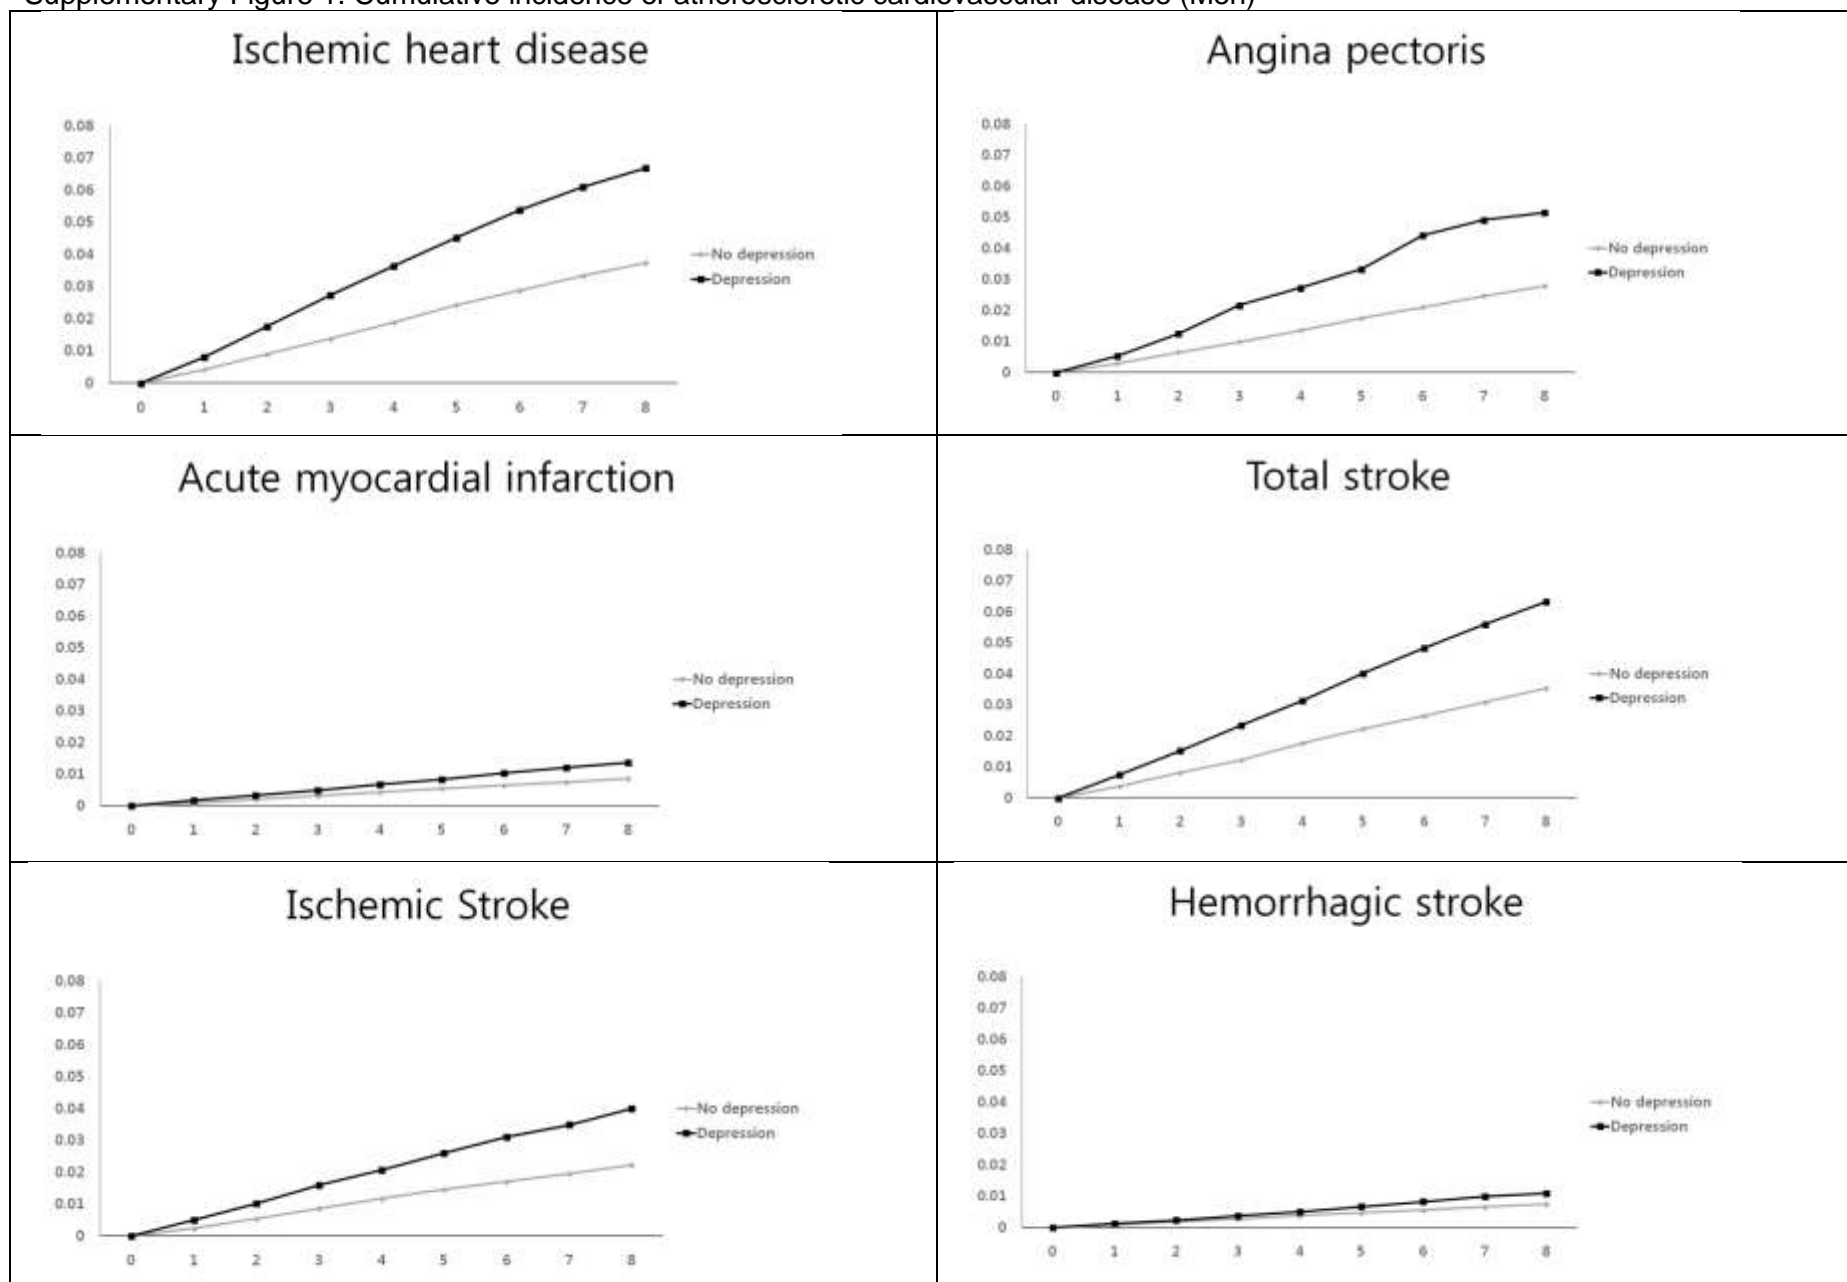

\*y-axis: cumulative incidence, x-axis: duration of follow-up, year

Supplementary Figure 2. Cumulative incidence of atherosclerotic cardiovascular disease (Women)

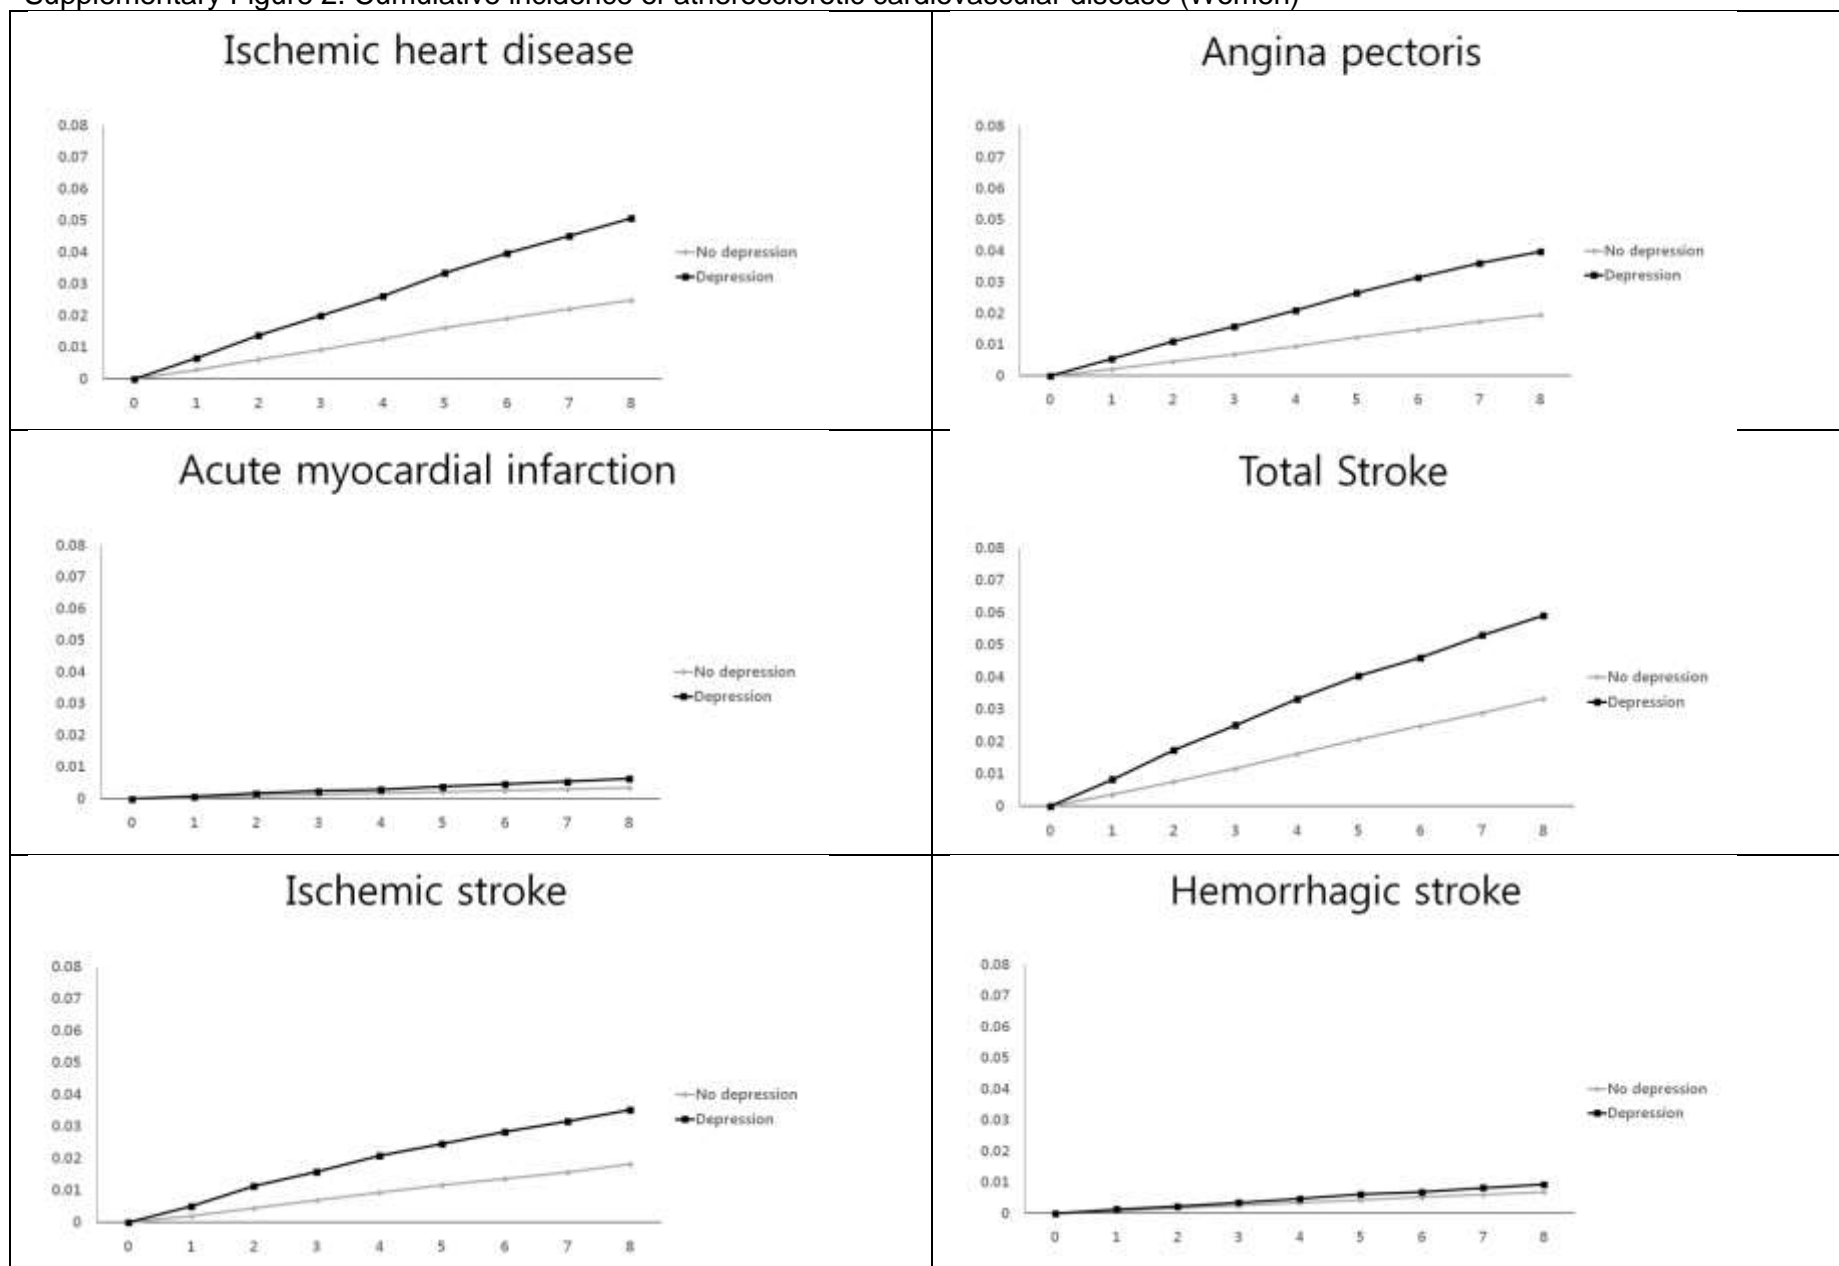

\*y-axis: cumulative incidence, x-axis: duration of follow-up, year
